# Supplementary material for: The design and initial patient evaluation of an integrated care pathway for faecal incontinence: a qualitative study
Source: PubMed Central journal article supplement (PMC4589900; doi:10.1186/s12913-015-1108-5), 2015-10-01
Supplement: 12913_2015_1108_MOESM2_ESM.pdf [file 12913_2015_1108_MOESM2_ESM.pdf]

## Appendix 2

### Interview Topic Guide

**Narrative interviews with opening question being question 1. Other questions can be used as guides for the rest of the conversation.**

- 1. Tell me about your condition?**  
*Onset, duration, effects on daily life*
- 2. Can you talk me through the pathway of treatment for faecal incontinence?**  
*How were you kept informed about your illness, treatment and logistics of treatment?*
- 3. How many different health professionals have been involved in your care?**  
*Number, roles, referred directly/separately?  
Smooth pathway?  
How long did you have to wait to see them?*
- 4. How do you feel about the ease of access to the service?**  
*Logistical/administrative ease*
- 5. What is your impression of the service? How well is it working?**  
*Has it helped? If so, how? If not, why not?*
- 6. Are you aware of any changes planned in the near future for the faecal incontinence service?**
- 7. In your opinion, how could the service be improved?**  
*Appointments, logistics, diagnostics, treatments*
- 8. What would count as success for you?**  
*Clinical, lifestyle etc*

#### **Closure**

*Explain next steps in project/likely timescales for completion etc... Can you suggest anybody else that it might be helpful for us to interview? Thank you.*
